# Supplementary material for: Hmgcs2 regulates M2 polarization of macrophages to repair myocardial injury induced by sepsis
Source: publisher site journal article supplement (doi:10.18632/aging.204944), 2023-08-09
Supplement: Supplementary file [file aging-v15i15-204944-supplementary-material-SD1.pdf]

## SUPPLEMENTARY FIGURE

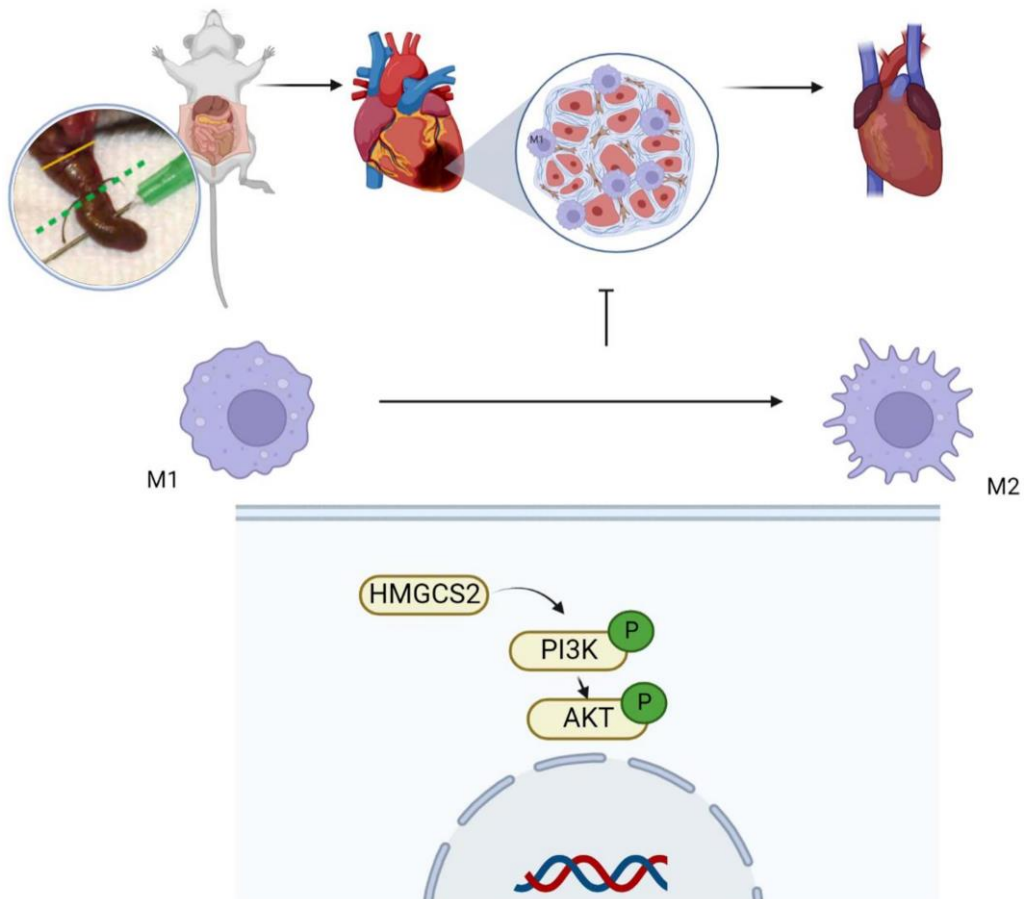

Supplementary Figure 1. The mechanisms of action of Hmgcs2 as an endogenous protective program in septic myocardial injury.
